# Supplementary material for: Coincidence detection between apical and basal dendrites drives STDP in cerebellar Golgi cells
Source: Research Square preprint supplement (doi:10.21203/rs.3.rs-4629101/v1), 2024-07-31
Supplement: Supplementary file 1 [file fbb0bcb000a04b1255132343.pdf]

# Coincidence detection between apical and basal dendrites drives STDP in cerebellar Golgi cells

E. Pali<sup>1</sup>, Masoli S<sup>1</sup>, D. Di Domenico<sup>1</sup>, T. Sorbo<sup>1</sup>, F. Prestori<sup>1,†\*</sup>, E. D'Angelo<sup>1,2,†\*</sup>

<sup>1</sup>Department of Brain and Behavioral Sciences, University of Pavia, Pavia, Italy 27100

<sup>2</sup>Digital Neuroscience Centre, IRCCS Mondino Foundation, Pavia, Italy 27100

† These authors share last authorship

*\*Correspondence:*

*Prof. Egidio D'Angelo*

dangelo@unipv.it

and

*Prof. Francesca Prestori*

francesca.prestori@unipv.it

Dept of Brain and Behavioral Sciences

via Forlanini 6, 27100 Pavia, Italy

## ***Supplementary Information***

### ***List of abbreviations:***

Ca<sup>2+</sup>, calcium;

LTP, long-term potentiation;

LTD, long-term depression;

mf, mossy fiber.

GrCs, granule cells;

GoCs, Golgi cells;

pf, parallel fiber;

aa, ascending axon;

EPSC, excitatory post-synaptic current;

EPSP, excitatory post-synaptic potential;

STDP, spike-timing dependent plasticity;

GL, granular layer.

### ***Supplementary note 1.***

#### ***Modeling of long-term synaptic plasticity***

Plasticity was modeled following the approach described in <sup>1</sup>, and <sup>2</sup>. The equations used below have been adapted mainly from <sup>1</sup>. According to the Ca<sup>2+</sup> control hypothesis <sup>3</sup>, synaptic plasticity is a non-linear [BCM-shaped] function of the activity-dependent rise in postsynaptic Ca<sup>2+</sup> concentration: large Ca<sup>2+</sup> transient should lead to LTP, while a moderate increase in Ca<sup>2+</sup> concentration determines LTD. When the Ca<sup>2+</sup> concentration change is negligible or null, no synaptic plasticity of any kind takes place. The computational model proposed by Shouval and Bear <sup>1</sup> for the hippocampus has been adapted to the mf - GrC synapse as follows.

### ***The $\Omega$ function***

The  $\Omega$  function expresses the relation between  $\text{Ca}^{2+}$  concentration and changes in synaptic weight (W).

$$\Omega = 0.5 + \text{sig}(\text{Ca} - \alpha_2, \beta_2) - 0.5 \text{sig}(\text{Ca} - \alpha_1, \beta_1)$$

Where *sig* is a sigmoidal function defined as:

$$\text{sig}(x, \beta) = \exp(\beta x) / (1 + \exp(\beta x))$$

with  $\alpha_1 = 0.25$ ,  $\alpha_2 = 0.77$ ,  $\beta_1 = 80$  and  $\beta_2 = 80$ . These values allowed to fit the plasticity model to existing experimental data <sup>4</sup>.

### ***The $\eta$ function***

The  $\eta$  function represents the calcium-dependent learning rate and is inversely related to the learning time constant  $\tau$  such that  $\eta = 1/\tau$ , with:

$$\tau = \frac{P_1}{P_2 + (\text{Ca})^{P_3}} + P_4$$

The values of parameters have been taken from <sup>2</sup>:  $P_1 = 100$  ms,  $P_2 = 0.002$ ,  $P_3 = 4$ ,  $P_4 = 1000$  msec.

**Supplementary Tables and Figures**

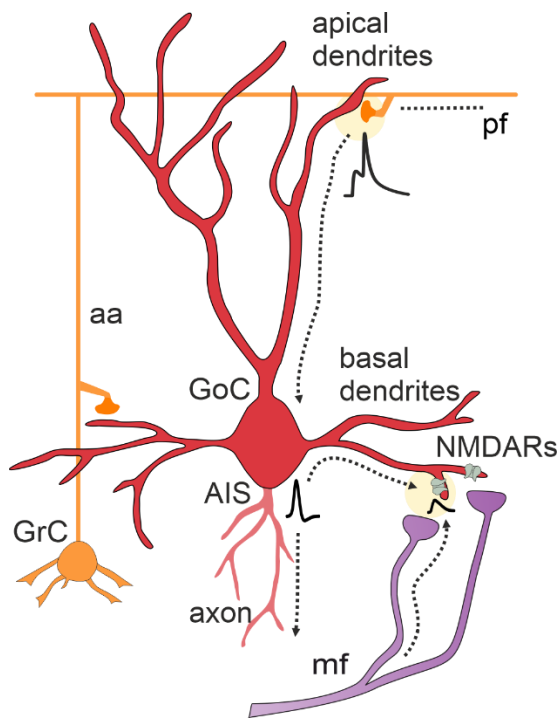

**Supplementary Figure 1. Schematic representation of a GoC.** Enlargement of the GoC microcircuit, illustrating the afferent excitatory inputs from pfs/aas and mfs onto apical and basal dendrites, respectively, and the process of dendritic integration revealed by previous experimental and modelling works <sup>5</sup>.

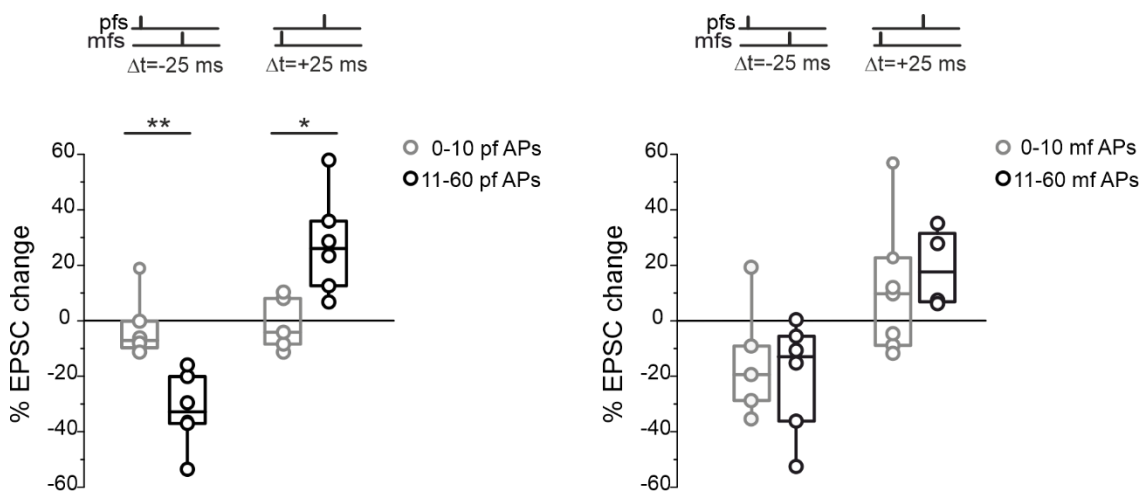

**Supplementary Figure 2. STDP requires the action potential elicited by parallel fiber stimulation.**

Box-and-whisker plots show the changes in EPSC amplitude based on the number of APs evoked by pf stimulation (left;  $\leq 10$  out of 60 stimuli, gray circles;  $> 10$  out of 60 stimuli, black circles) or by mf stimulation (right;  $\leq 10$  out of 60 stimuli, gray circles;  $> 10$  out of 60 stimuli, black circles) during STDP induction. \*,  $p < 0.05$ , \*\*,  $p < 0.01$ , \*\*\*,  $p < 0.001$ ; Student's unpaired  $t$ -test.

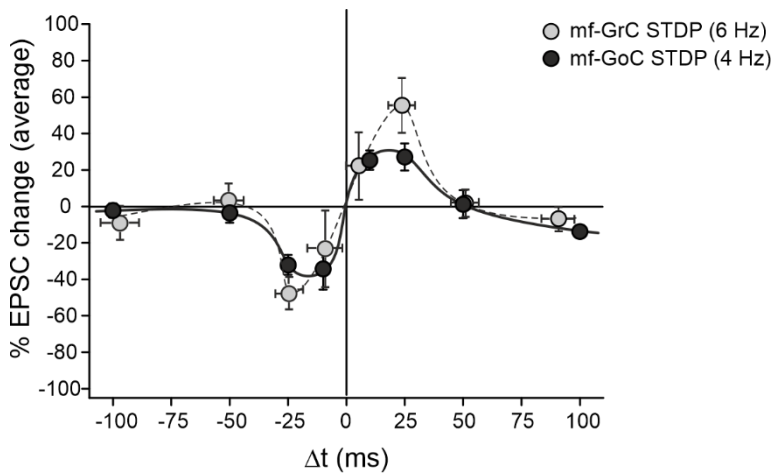

**Supplementary Figure 3. STDP in the GL.** mf-GoC STDP timing curve obtained following pf-EPSP  $\rightarrow$  mf-EPSP and mf-EPSP  $\rightarrow$  pf-EPSP pairing ( $\Delta t = \pm 25$  ms; black circles) compared with that obtained from <sup>6</sup> (gray circles). Data in the plot indicates mean  $\pm$  SEM.

### *Supplementary References*

1. Shouval, H. Z., Bear, M. F. & Cooper, L. N. A unified model of NMDA receptor-dependent bidirectional synaptic plasticity. *Proc Natl Acad Sci U S A* **99**, 10831–10836 (2002).
2. Rackham. A Ca<sup>2+</sup>-based computational model for NMDA receptor-dependent synaptic plasticity at individual post-synaptic spines in the hippocampus. *Frontiers in Synaptic Neuroscience* **2**, 1–12 (2010).
3. Lisman, J. A mechanism for the Hebb and the anti-Hebb processes underlying learning and memory. *Proceedings of the National Academy of Sciences of the United States of America* **86**, 9574–8 (1989).
4. D’Errico, A., Prestori, F. & D’Angelo, E. Differential induction of bidirectional long-term changes in neurotransmitter release by frequency-coded patterns at the cerebellar input. *The Journal of physiology* **587**, 5843–57 (2009).
5. Masoli, S., Ottaviani, A., Casali, S. & D’Angelo, E. Cerebellar Golgi cell models predict dendritic processing and mechanisms of synaptic plasticity. *PLoS Comput Biol* **16**, (2020).
6. Sgritta, M., Locatelli, F., Soda, T., Prestori, F. & D’Angelo, E. U. Hebbian spike-timing dependent plasticity at the cerebellar input stage. *Journal of Neuroscience* **37**, (2017).
